# Supplementary material for: Heterometallic metal–organic framework nanocages of high crystallinity: an elongated channel structure formedin situthrough metal-ion (M = W or Mo) doping
Source: Royal Society of Chemistry journal article supplement (doi:10.1039/c8ta04892d), 2018-01-01
Supplement: c8ta04892d1.pdf [file c8ta04892d1.pdf]

## Supporting Information for

### Heterometallic Metal-organic Framework Nanocages of High Crystallinity: Elongated Channel Structure Formed *in-situ* Through Metal-ions (M=W or Mo) Doping

Jinxin Wei,<sup>ab</sup> Niancai Cheng,<sup>ab</sup> Zhiyu Liang,<sup>ab</sup> Yufeng Wu,<sup>ab</sup> Zhigang Zou,<sup>bc</sup> Zanyong Zhuang,<sup>\*ab</sup> and Yan Yu<sup>\*ab</sup>

<sup>a</sup>College of Materials Science and Engineering, Fuzhou University, New Campus, Minhou, Fujian 350108, China

<sup>b</sup>Key Laboratory of Eco-materials Advanced Technology (Fuzhou University), Fujian Province University, Fuzhou, Fujian 350108, China

<sup>c</sup>Jiangsu Key Laboratory for Nano Technology, Nanjing University, Nanjing 210093, China

\* E-mail: zyzhuang@fzu.edu.cn, yuyan\_1972@126.com

### Supplemental Figures and Discussions

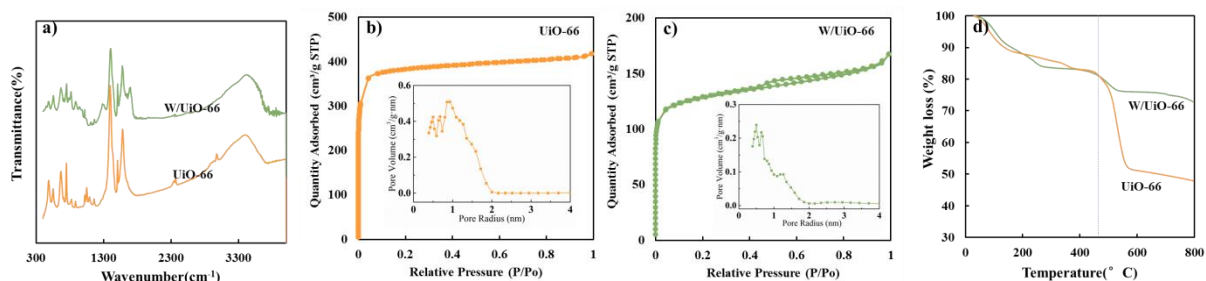

**Figure S1.** (a) FT-IR spectra, (b,c) N<sub>2</sub> adsorption-desorption isotherms curves and the corresponding pore size distribution curves, and (d) TGA curves of UiO-66 and W/UiO-66.

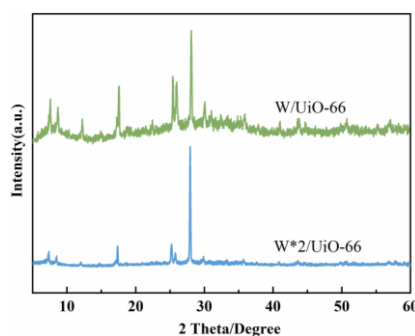

**Figure S2.** XRD patterns of W/UiO-66 and W\*2/UiO-66 nanocages.

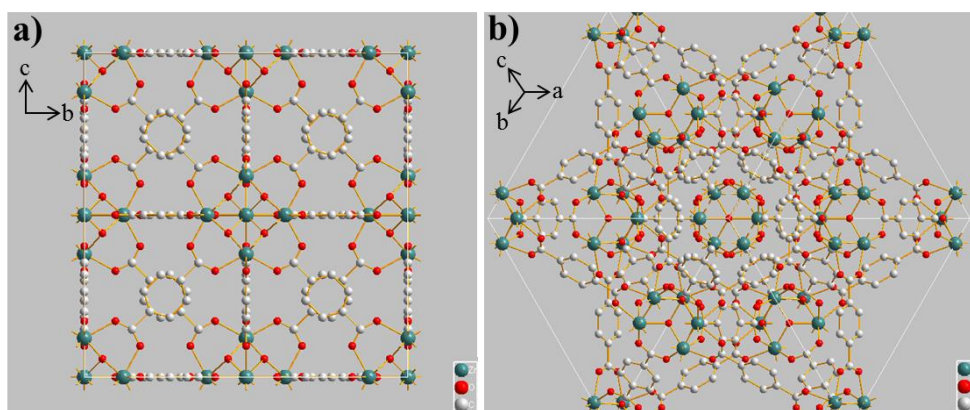

**Figure S3.** The crystalline structure of UiO-66 seen from (a)  $\langle 100 \rangle$  direction and (b)  $\langle 111 \rangle$  direction, respectively.

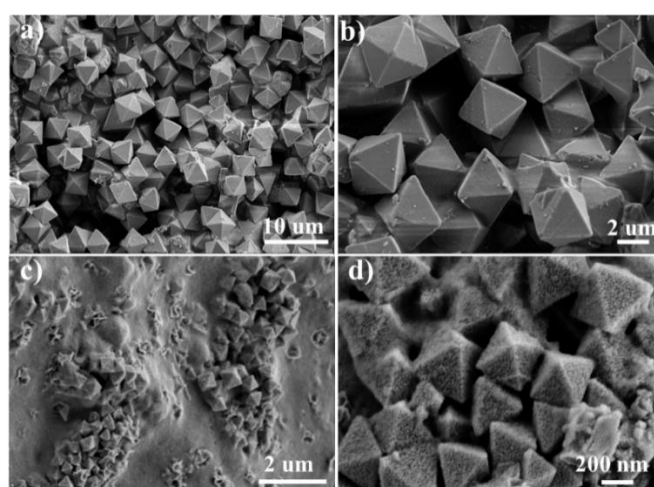

**Figure S4.** SEM images of solid UiO-66 (a,b) immersed in acid solution or (c,d) immersed in  $\text{Na}_2\text{WO}_4$  solution at  $180^\circ\text{C}$  for 4 h.

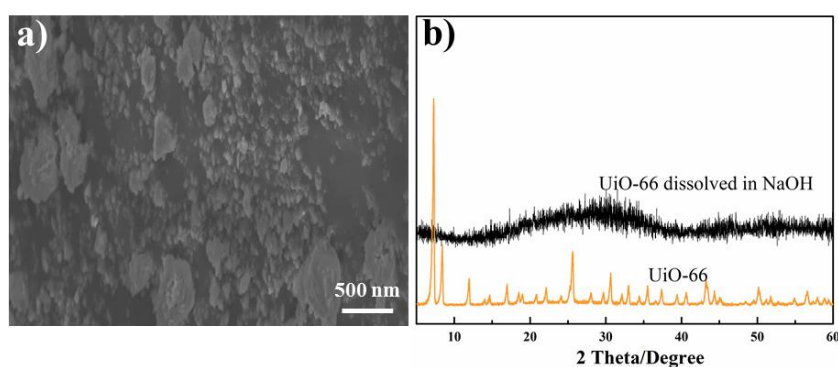

**Figure S5.** (a) SEM picture of the UiO-66 dissolve in alkaline solution; XRD patterns of UiO-66 dissolved in NaOH compared with UiO-66.

## Investigation of the phase of W in cages

Unfortunately, we found that despite the abundance of W in nanocages, there was not any lattice fringe of  $\text{WO}_3$  observed in the HRTEM images of the nanocages. To detect the  $\text{WO}_3$ , Raman spectra and diffuse reflectance spectra (DRS) were recorded. Figure S4a,b shows that compared with fresh UiO-66, the W/UiO-66 nanocages contained a new Raman peak at  $960\text{--}970\text{ nm}^{-1}$ , which differed from the peak of  $\text{Na}_2\text{WO}_4$  ( $931.5\text{ nm}^{-1}$ ) and could be attributed to  $2\text{ nm } \text{WO}_3$  ( $964\text{ nm}^{-1}$ ).<sup>1</sup> The occurrence of  $\text{WO}_3$  was further supported by UV-vis analysis. Figure S5 shows that the absorption edge of the nanocages was between that of pure  $\text{WO}_3$  (450 nm) and UiO-66 (340 nm), which indicated a hybrid of  $\text{WO}_3$  and UiO-66. Furthermore, after the formation of nanocages, there were fewer micropores whose size was less than 2 nm (Figure S6), which also well agreed with the filling of newly-formed  $\text{WO}_3$  particles in micropores of UiO-66. All these results could support our hypothesis that  $\text{WO}_4^{2-}$  reacted with UiO-66 during the formation of nanocages.

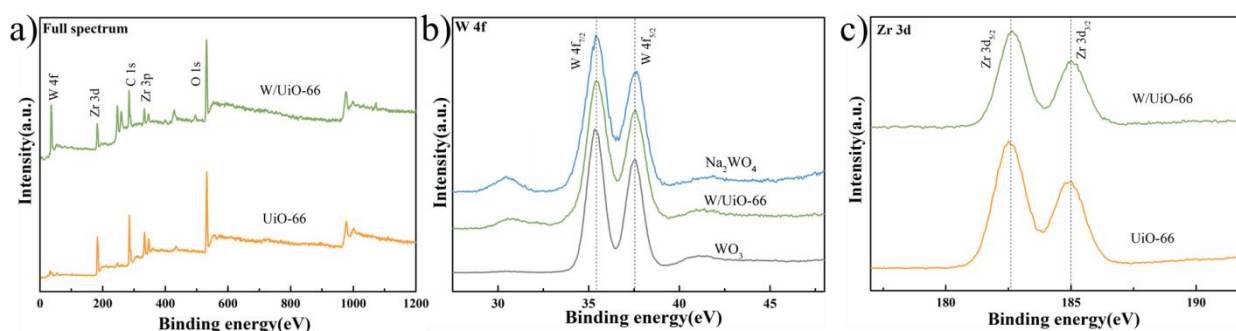

**Figure S6.** (a) Survey XPS spectra and (b) high-resolution XPS spectra of W 4f peaks of  $\text{Na}_2\text{WO}_4$ , W/UiO-66, and  $\text{WO}_3$ . (c) The high-resolution XPS spectra of Zr 3d peaks of UiO-66 and W/UiO-66 nanocages.

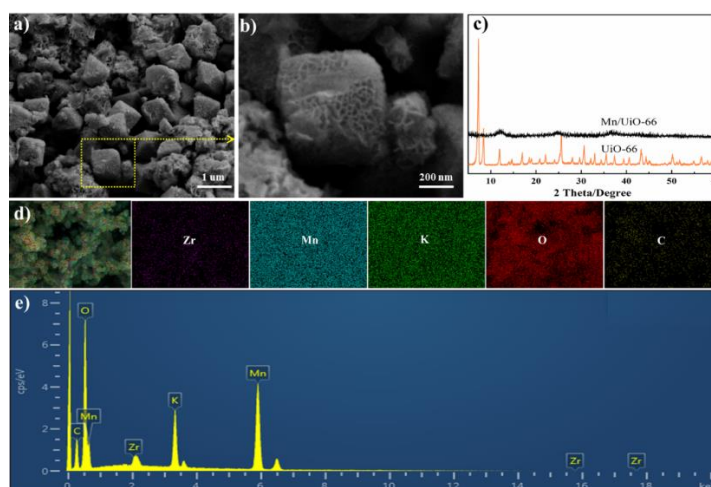

**Figure S7.** (a, b) SEM images of Mn/UiO-66; (c) XRD patterns of pristine UiO-66 and Mn/UiO-66; (d) elemental mapping images of Zr, Mn, K, O, C in the Mn/UiO-66; (e) EDS pattern of Mn/UiO-66.

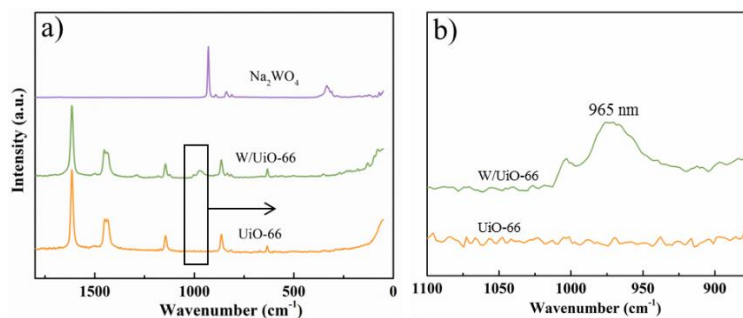

**Figure S8.** (a) Raman spectra of  $\text{Na}_2\text{WO}_4$ , W/Uio-66, and UiO-66; (b) Raman spectra of samples with wavenumber ranging from 900 to 1100  $\text{cm}^{-1}$ .

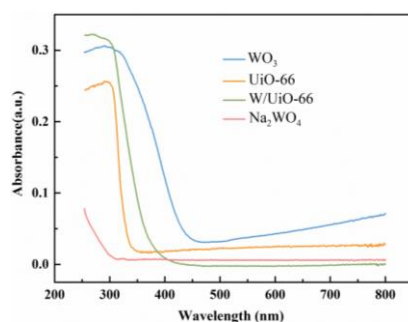

**Figure S9.** Diffuse Reflectance Spectra (DRS) of UiO-66, W/Uio-66,  $\text{WO}_3$ , and  $\text{Na}_2\text{WO}_4$ .

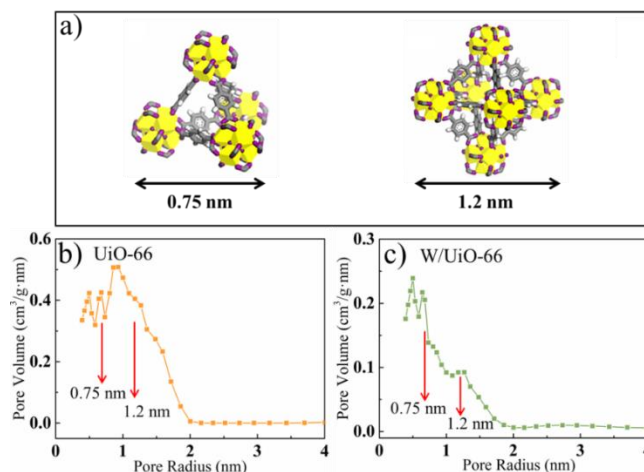

**Figure S10.** (a) Owing to its intrinsic structural features, UiO-66 contained both tetrahedral and octahedral pores, which had distinctive dimensions of 0.75 and 1.2 nm, respectively. (b, c) shows that although the  $<0.72$  nm micropores were preserved after the incorporation of W into UiO-66, the  $\sim 1.2$  nm pores were lost significantly. This loss indicated that small particles accumulated inside the octahedral pores.

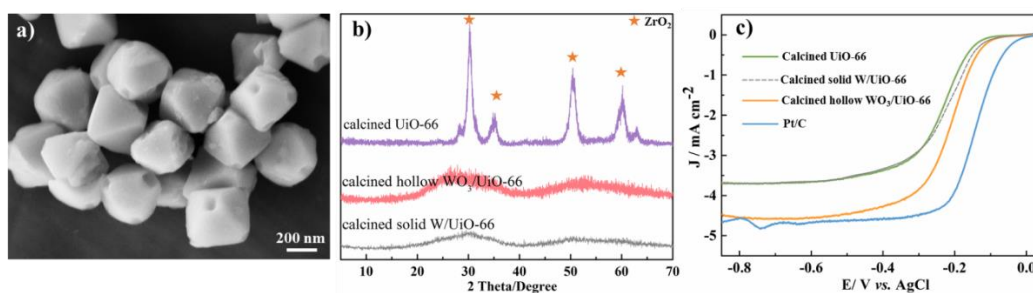

**Figure S11.** (a) SEM image of calcined  $\text{WO}_3/\text{Uio-66}$  collected at etching time of 2h; (b) XRD patterns and (c) LSV curves of annealed  $\text{Uio-66}$ ,  $\text{WO}_3/\text{Uio-66}$ , and  $\text{W/Uio-66}$  collected at  $t=2$  h. Pt/C was set as a comparison with the above three samples in ORR activity.

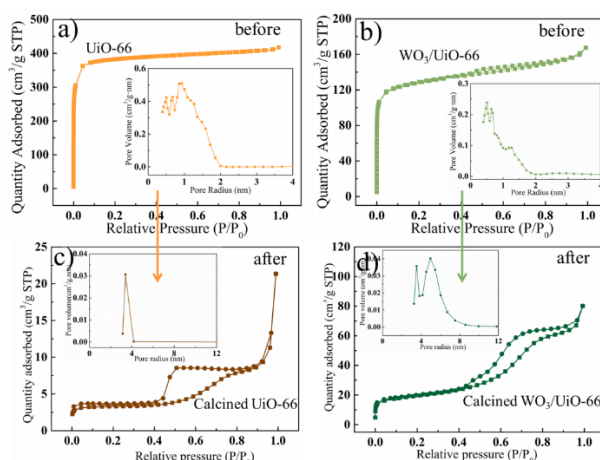

**Figure S12.**  $\text{N}_2$  adsorption-desorption isotherms and the corresponding pore size distribution curves of (a)  $\text{Uio-66}$ , (b)  $\text{WO}_3/\text{Uio-66}$ , (c) calcined  $\text{Uio-66}$ , and (d) calcined  $\text{WO}_3/\text{Uio-66}$ .

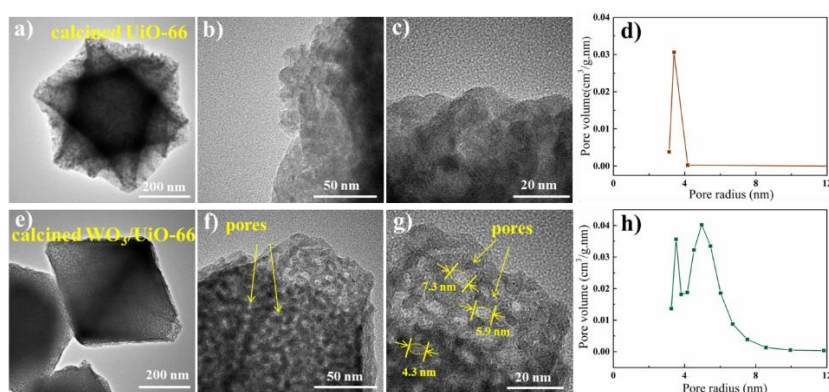

**Figure S13.** (a–c) TEM images of calcined  $\text{Uio-66}$ ; (d) The corresponding pore size distribution curve of calcined  $\text{Uio-66}$ ; (e–g) TEM images of calcined  $\text{WO}_3/\text{Uio-66}$ ; (h) The corresponding pore size distribution curve of calcined  $\text{WO}_3/\text{Uio-66}$ .

## References

1. M. Boulova and G. Lucazeau, *J. Solid. State. Chem.*, 2002, **167**, 425-434.
